# Supplementary material for: Analgesic Efficacy of Melatonin: A Meta-Analysis of Randomized, Double-Blind, Placebo-Controlled Trials
Source: PubMed Central journal article supplement (PMC7291209; doi:10.3390/jcm9051553), 2020-05-21

# Supplementary Figure S1. Publication bias analysis

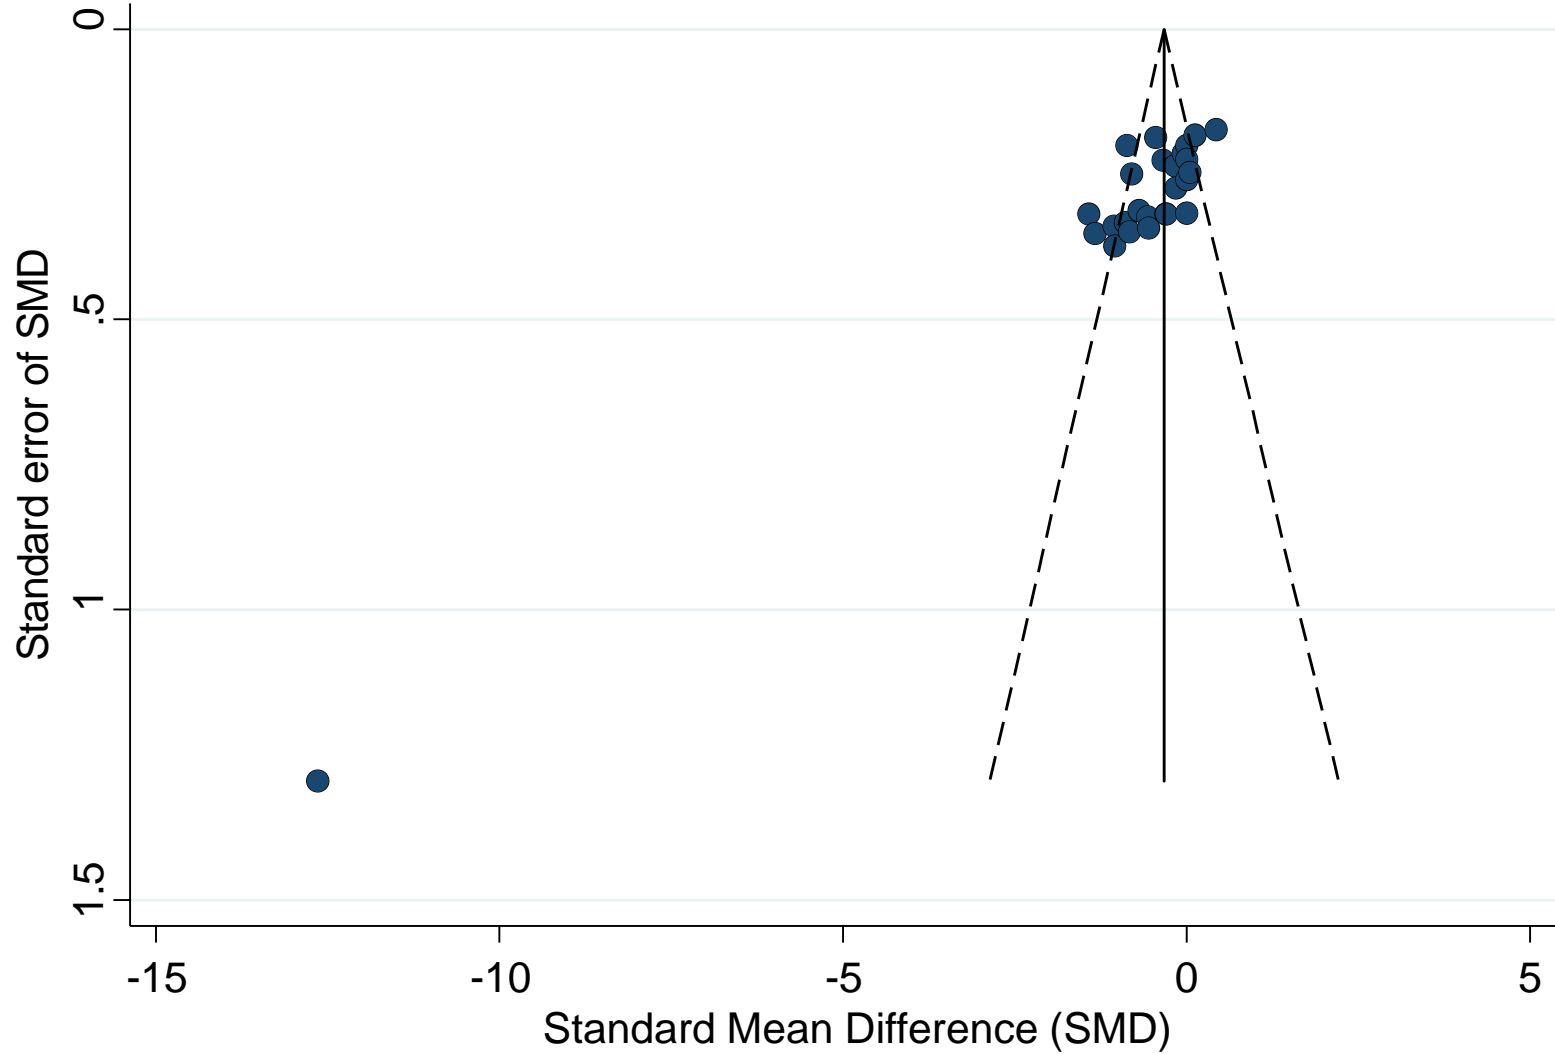

Supplement: jcm-09-01553-s001.pdf [file jcm-09-01553-s001.pdf]
